# Supplementary material
Source: PubMed Central journal article supplement (PMC5963846)
Supplement: joces-131-213868-s1.pdf [file joces-131-213868-s1.pdf]

## Supplementary Data

**Supplementary table 1:** List of primers used in this study for ChIP experiments were shown.

| Gene name    | Primer sequence        | Location                                      |
|--------------|------------------------|-----------------------------------------------|
| ANAPC5 For:  | GGAGATGTGGTGGTGGATCT   | chr12:121756213-121756365,<br>strand= reverse |
| ANAPC5 Rev:  | ACCGGTACTCCTTGGAGAGG   |                                               |
| SMC1A For:   | CGGTGAACCTCTGAAATGGT   | chrX: 53449441-53449547,<br>strand= forward   |
| SMC1A Rev:   | TGGGGTTCCTGAAACTGATT   |                                               |
| MUS81 For:   | TCTCAAACCCTCTCTGCTC    | chr11:65632546-65632715,<br>strand= forward   |
| MUS81 Rev:   | AAACACTTCTCGCACCGACT   |                                               |
| CDCA2 For:   | CCTGAAACCAAGGAGTCTGC   | chr8:25317784-25317933,<br>strand= forward    |
| CDCA2 Rev:   | TCTTCCCAGTCCC AAAATG   |                                               |
| ANAPC12 For: | GACCCGTAAGAAACAGAAGGAA | chr9:116029543-116029694,<br>strand= reverse  |
| ANAPC12 Rev: | TGAACGATTATTGGGCTTGG   |                                               |
| AURKA For:   | CAGGCCAATCGGCTTTCTA    | chr20:54967248-54967345,<br>strand= reverse   |
| AURKA Rev:   | TTCCAAGAGCTCAGCCGTTA   |                                               |

**Supplementary table 2:** List of primers used in this study for qRT-PCR analysis were shown.

| Gene name    | Primer sequence        |
|--------------|------------------------|
| DDB1 For:    | TGCCTACAAGCCCATGGAAG   |
| DDB1 Rev:    | TGGCAGCGCTATCCTTTTGA   |
| RNF40 For:   | AAGAGGGCTCAGGAGGACAT   |
| RNF40 Rev:   | CATCTGCGTAGACCTCCACC   |
| DDB1 For:    | ATCATTGACCCTGAGTGCCG   |
| DDB1 Rev:    | CCTGAGGGTCCTGGTAGACA   |
| CUL7 For:    | TACCAGGAGGGTCCTCAAG    |
| CUL7 Rev:    | TTCTCCAAGTCTGGCCGTC    |
| SMU1 For:    | TGGCACTGTAAAGATCTGGAA  |
| SMU1 Rev:    | CTGTTGCACACCACAAAGTG   |
| SMC1a_For:   | TACCTCAGTTCTCGGGCGTA   |
| SMC1a_Rev:   | TGACTTACCAGAGCCATTGGG  |
| MUS81_For:   | GGCCCAGGAGACCAATCCT    |
| MUS81_Rev:   | TTCAGCCGGAAGTCTGCTC    |
| AURKA_For:   | GTCAAGTCCCCTGTCGGTTC   |
| AURKA_Rev:   | GCAATGGAGTGAGACCCTCT   |
| ANAPC5_For:  | CGGTCACTATCAACAGGCAGA  |
| ANAPC5_Rev:  | GCGAGGTACGGTAACCCAAA   |
| ANAPC12_For: | AGGCCGGCTTGAAAAGAGATTA |
| ANAPC12_Rev: | GGGCCAAACCCAGTGAATA    |
| CDCA2_For:   | CCGAAGACTGGGTTCAGGTTA  |
| CDCA2_Rev:   | TGCCAAGCGATGAGGAACTT   |

## Figure S1

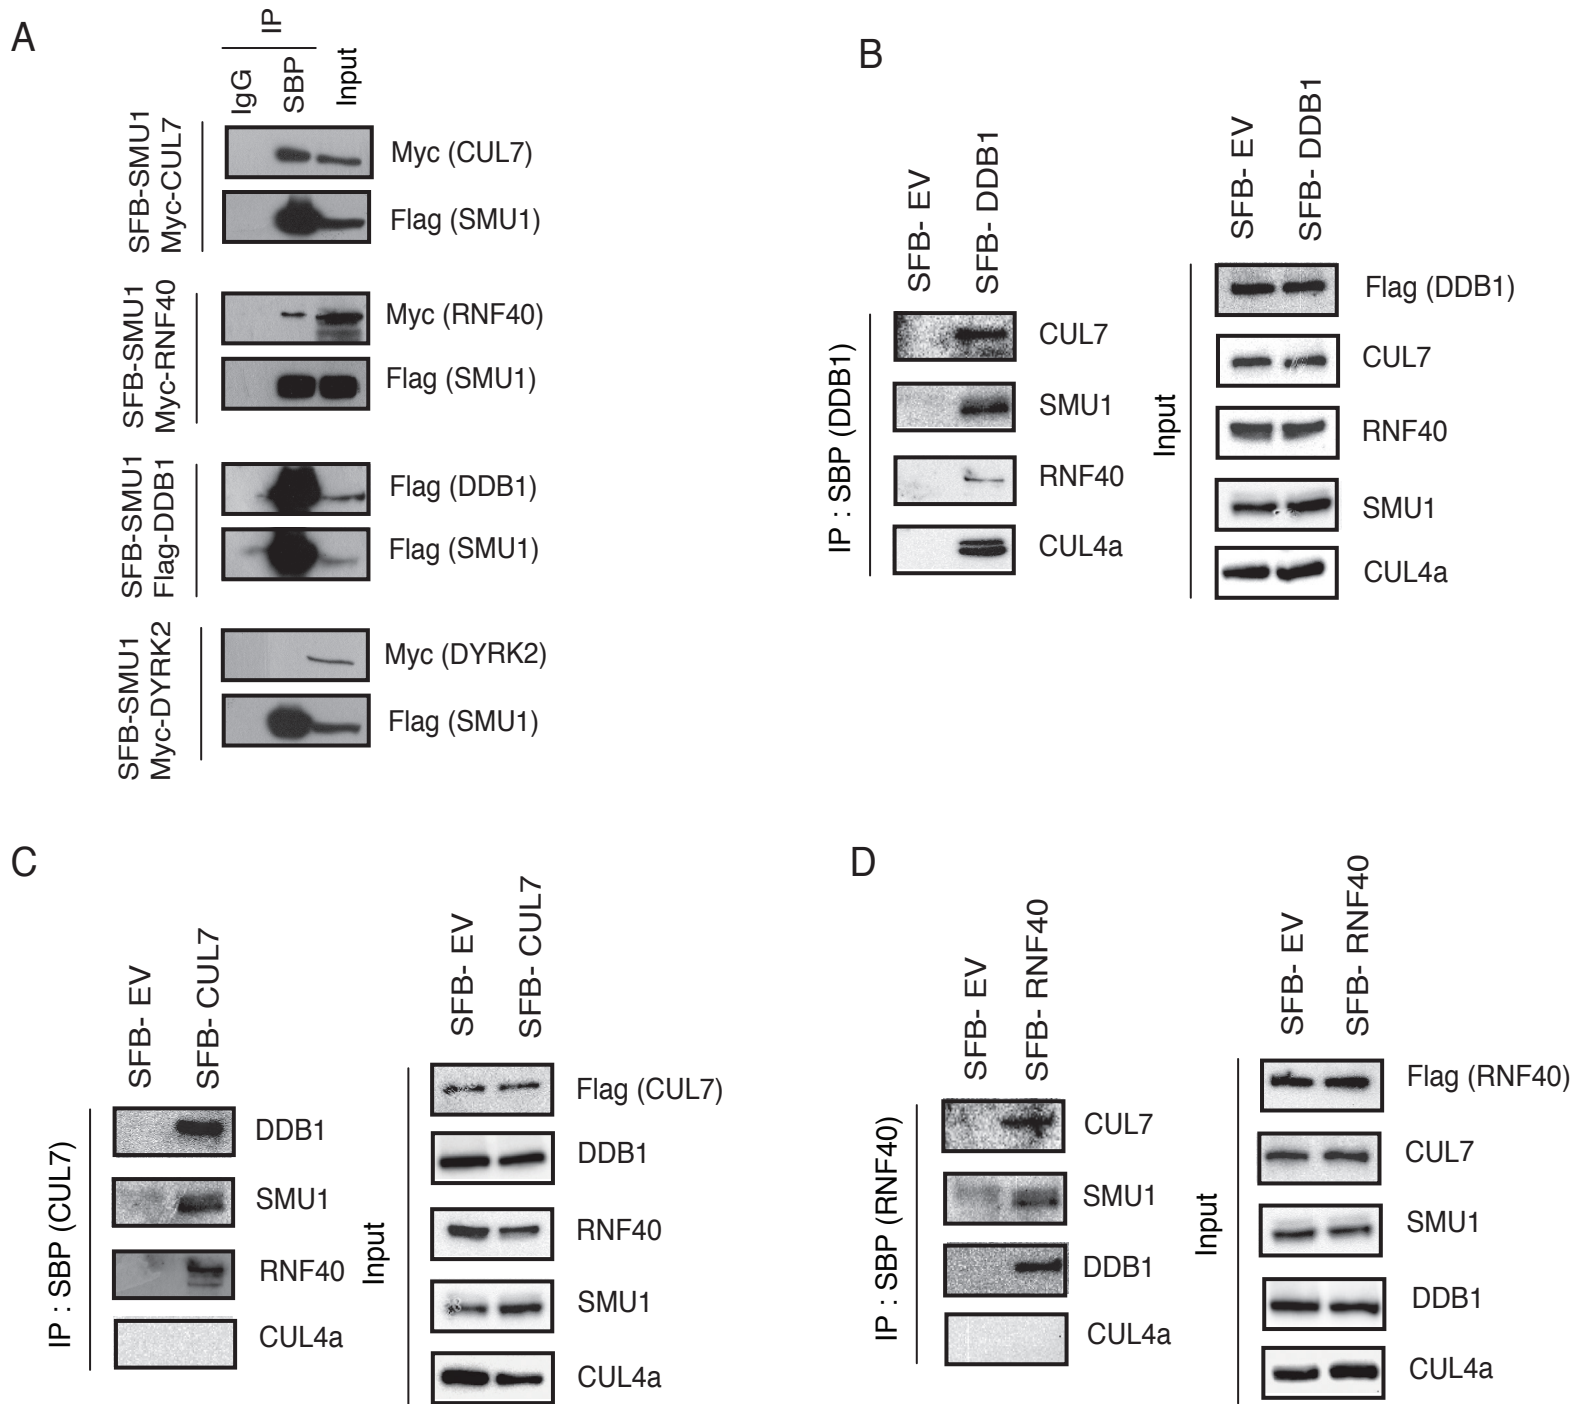

**Supplementary Figure S1:** (A) 293T cells were transfected with SFB tagged SMU1 along with Myc- CUL7, MYC-RNF40, Flag-DDB1 and Myc-DYRK2. The presence of RNF40, DDB1, CUL7 and DYRK2 in SMU1 complex proteins was evaluated by immunoblotting with the indicated antibodies. (B) Cells were transfected with either SFB-Empty vector (EV) or SFB-DDB1 (C) SFB-CUL7 (D) and SFB-RNF40. Interaction of SMU1-DDB1-CUL7-RNF40 was assessed by immunoblotting with respective antibodies after pulling down with streptavidin sepharose.

## Figure S2

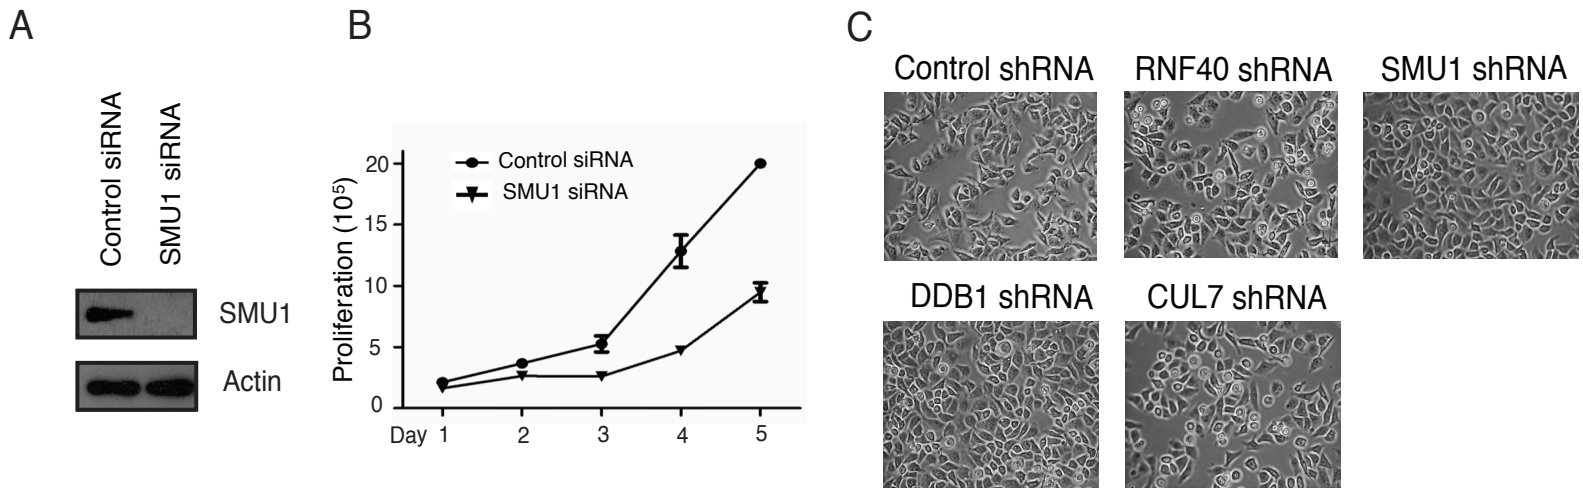

**Supplementary Figure S2:** (A) HeLa cells transfected with control or SMU1 siRNA. Cell lysates were checked for knockdown of SMU1 using SMU1 specific antibody and actin was used as loading control. (B) HeLa cells were transfected with control and SMU1 siRNA separately. 48 hr post transduction  $1 \times 10^5$  cells were seeded in five different plates and rate of cell proliferation was measured by cell counting after staining with trypan blue dye. (C) Cells were transduced with control shRNA, RNF40 shRNA, SMU1 shRNA, DDB1 shRNA or CUL7 shRNA. 72 hours post transduction, mitotic cells (rounded off cells) were imaged in phase contrast microscope and representative images were shown.

## Figure S3

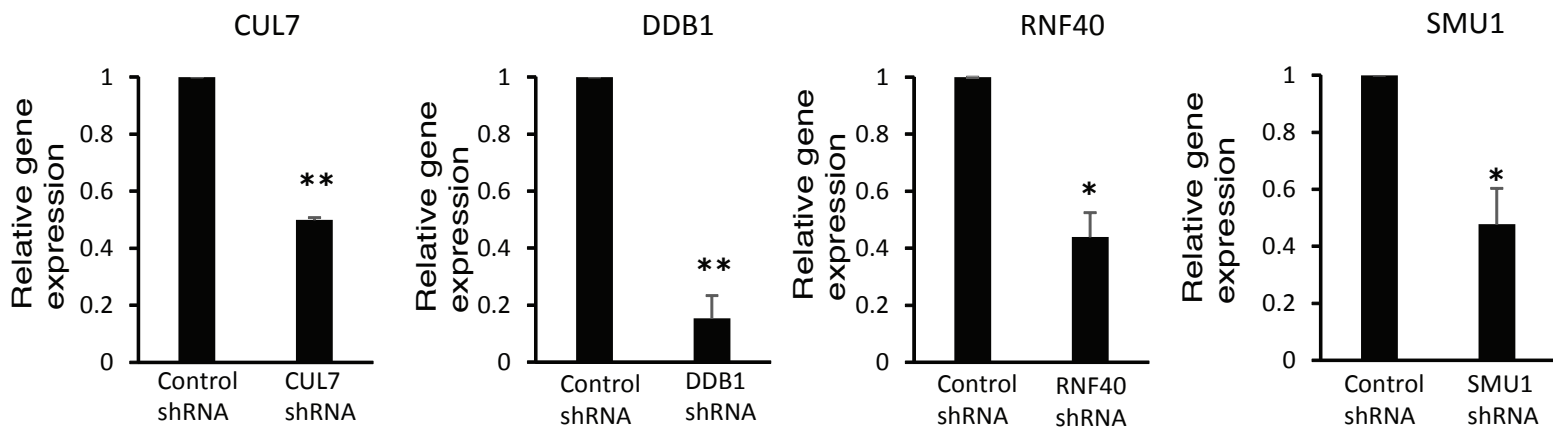

**Supplementary Figure S3:** Total RNA was extracted from HeLa cells transfected with control or SMU1 siRNA or CUL7 shRNA or DDB1 shRNA and RNF40 shRNA, and expression levels of various genes measured by qRT-PCR was shown. Statistical analysis: error bars- standard deviation, \*\*\* $P < 0.001$  \*\* $P < 0.01$ ; \* $P < 0.05$ , Student's t-test.

# Figure S4

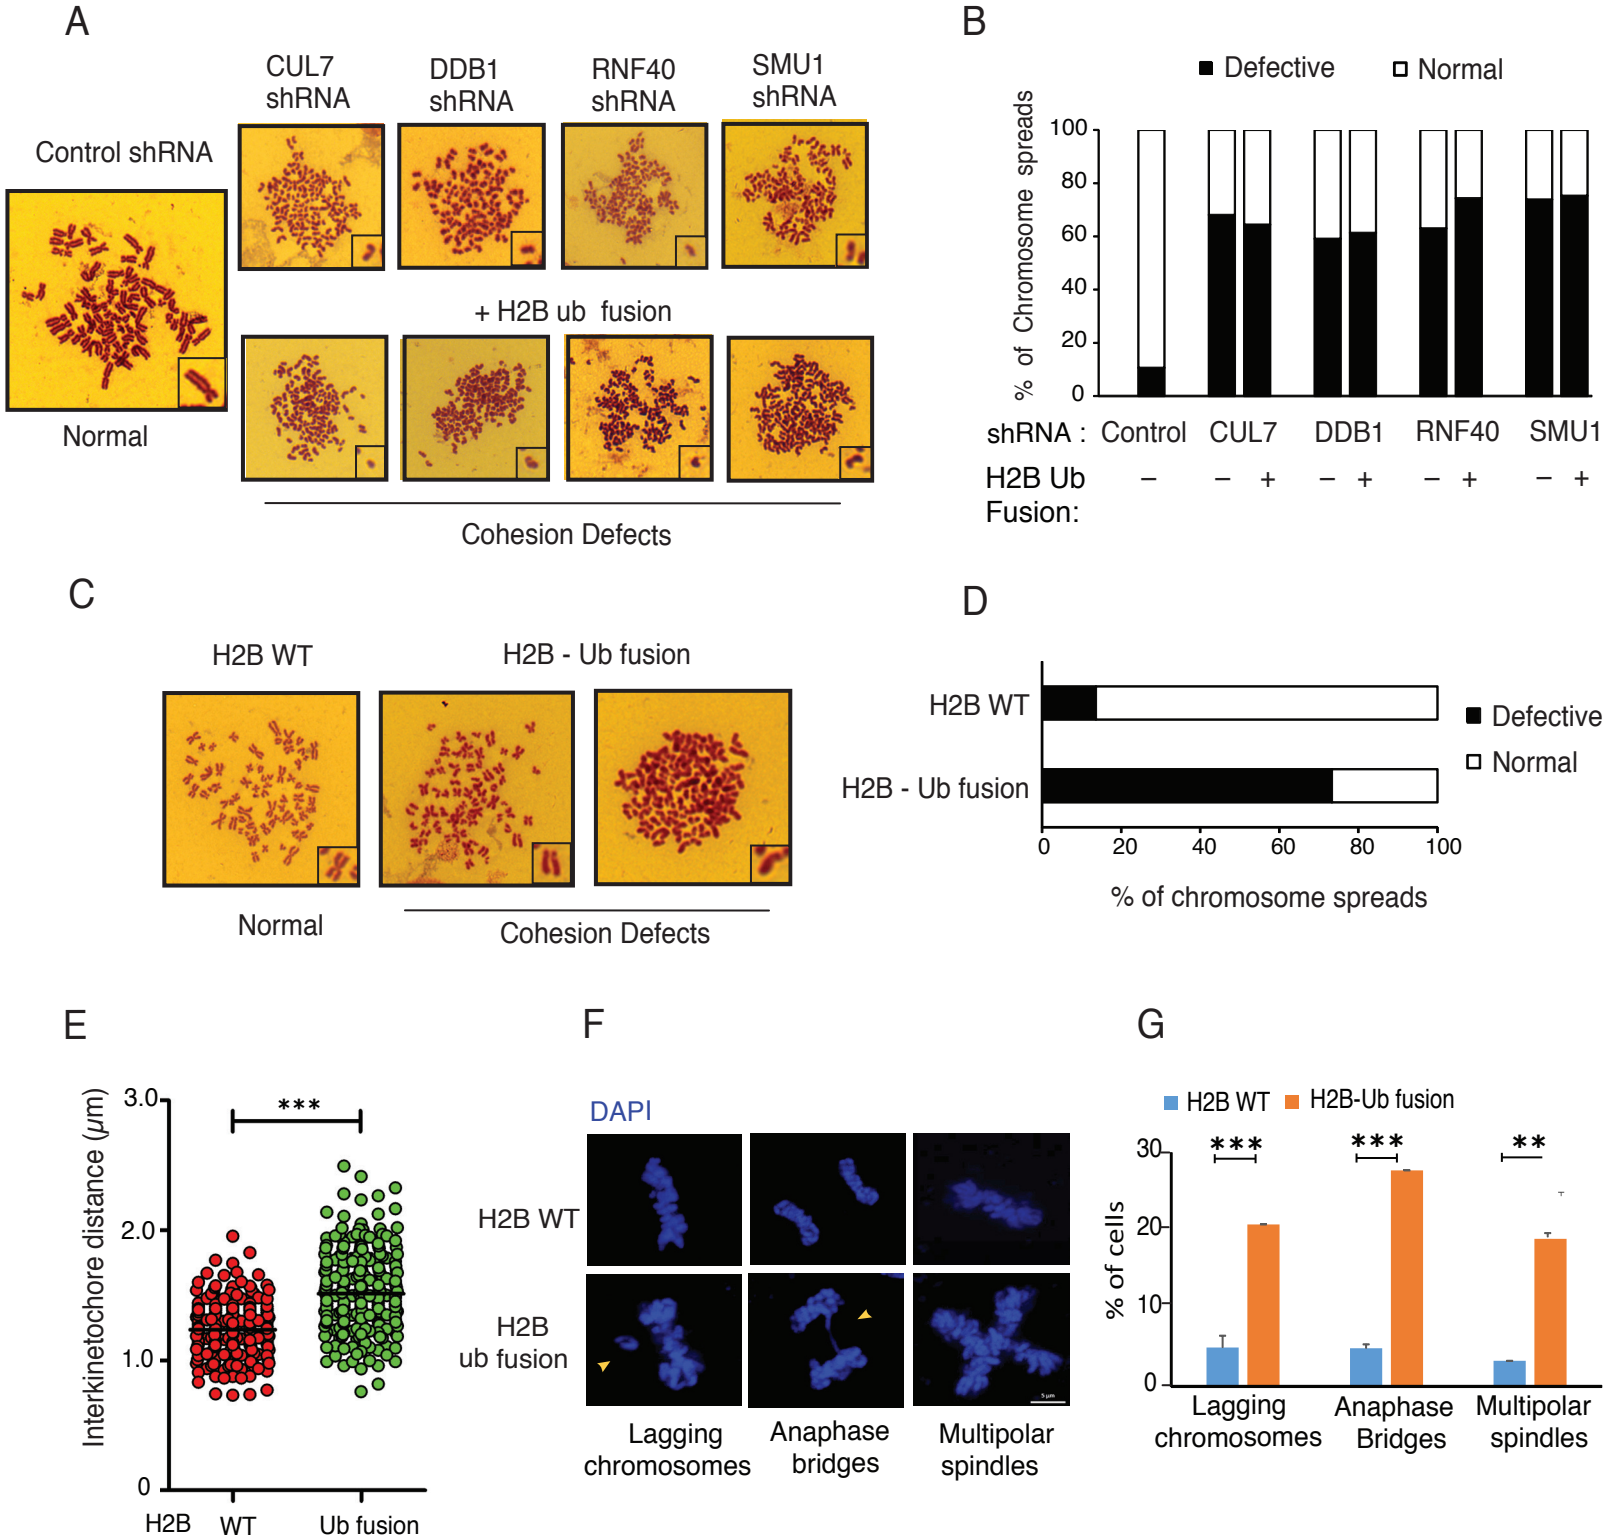

**Supplementary Figure S4:** (A) Cells expressing control shRNA, CUL7 shRNA, DDB1 shRNA, RNF40 shRNA and SMU1 shRNA alone or together with H2B-Ub fusion were analysed for chromatid cohesion (n= 75). (B) Percentage of chromosome spreads showing normal and defective cohesion was plotted. P value is less than 0.001 for knockdown of complex proteins compared to control and non-significant between shRNA alone and along with H2B-Ub fusion (C) Chromosome spreads were prepared from HeLa cells transfected with either H2B wild type or H2B-Ub fusion. Representative images of chromosome spreads are shown. (D) Quantification of data from figure S3C is shown. (n= 90),  $p < 0.001$ . (E) The distance between paired kinetochores was measured for cells transfected with either H2B WT or H2B-Ub fusion. (F) Cells were transfected with H2B Wild type (WT) or H2B-Ub fusion protein. Mitotic defects were detected using immunofluorescence after staining with DAPI (Scale bar, 10 $\mu$ m). (G) Quantification of the data from figure S5F is shown (n=25 cells each). Statistical analysis: error bars- standard deviation, \*\*\* $P < 0.001$  \*\* $P < 0.01$ ; \* $P < 0.05$ , Student's t-test. (Scale bar, 5 $\mu$ m).
